# Supplementary material
Source: publisher figshare collection journal article supplement (https://springernature.figshare.com/ndownloader/files/22955879)
Supplement: Supplementary file 1 [file 22955879]

**Additional file 2: Figure S1.**

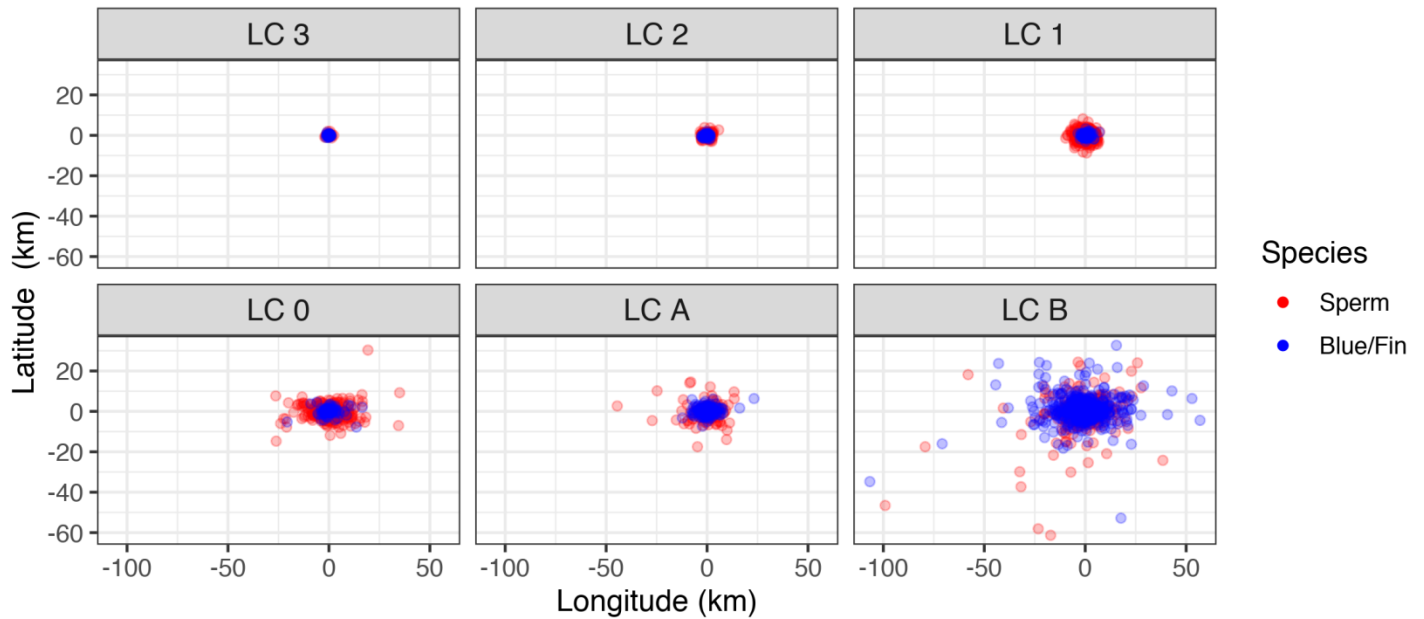

Bivariate scatterplots of errors for Argos locations compared to temporally matched Fastloc GPS locations by location class (LC) calculated for three large whale species (sperm, blue, and fin). Data were collected from sperm whales tracked in the Gulf of Mexico during summer 2011 and 2013, and from blue and fin whales tracked off southern California during late summer 2014 and 2015.
